# Supplementary material
Source: ML conference proceedings conference paper supplement (https://openreview.net/forum?id=K6Zl3gAtMu)

# Disease Hotspot Distribution

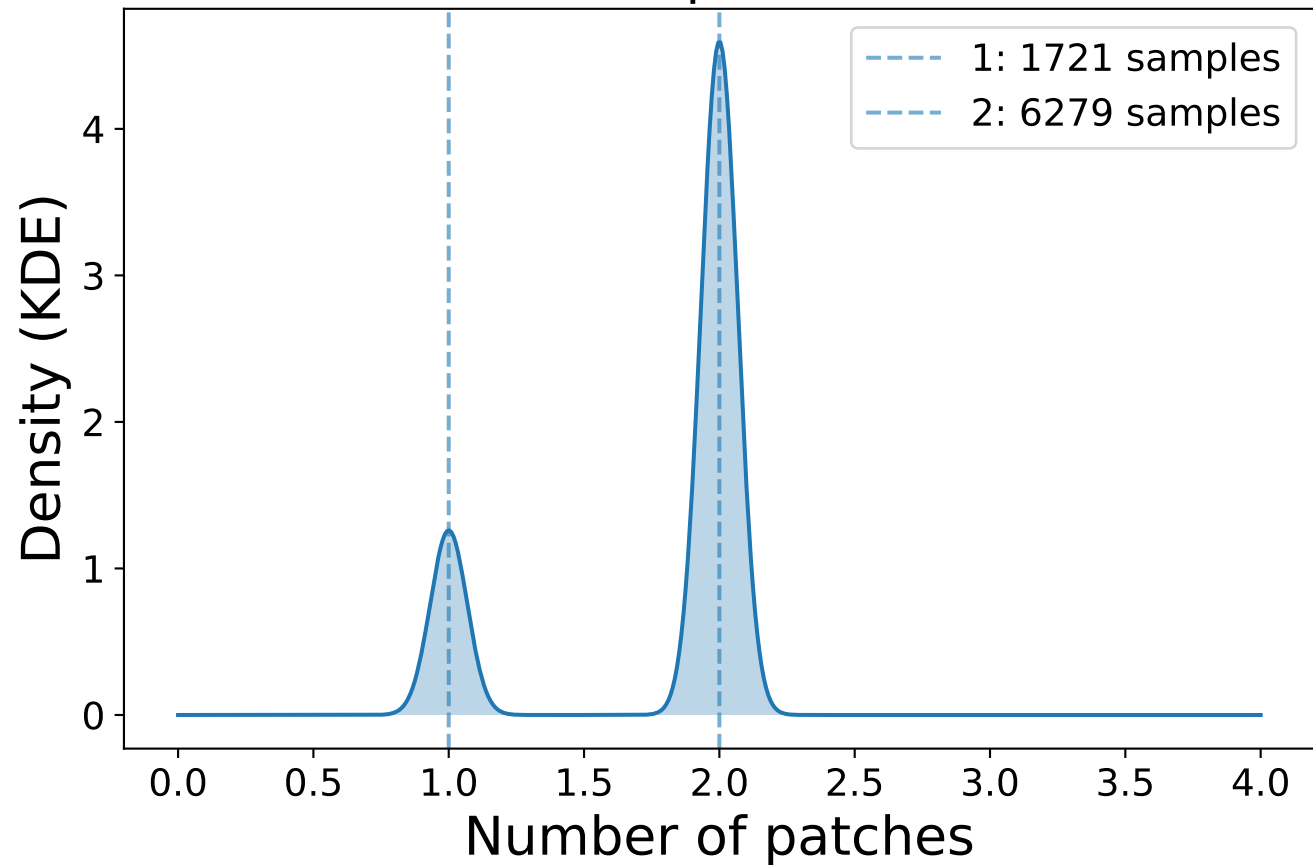

Supplement: supplementary_material [file hotspot_distribution.pdf › FoliageGenerator/src/soybean/hotspot_distribution.pdf]

# Distribution of disease rate in dataset

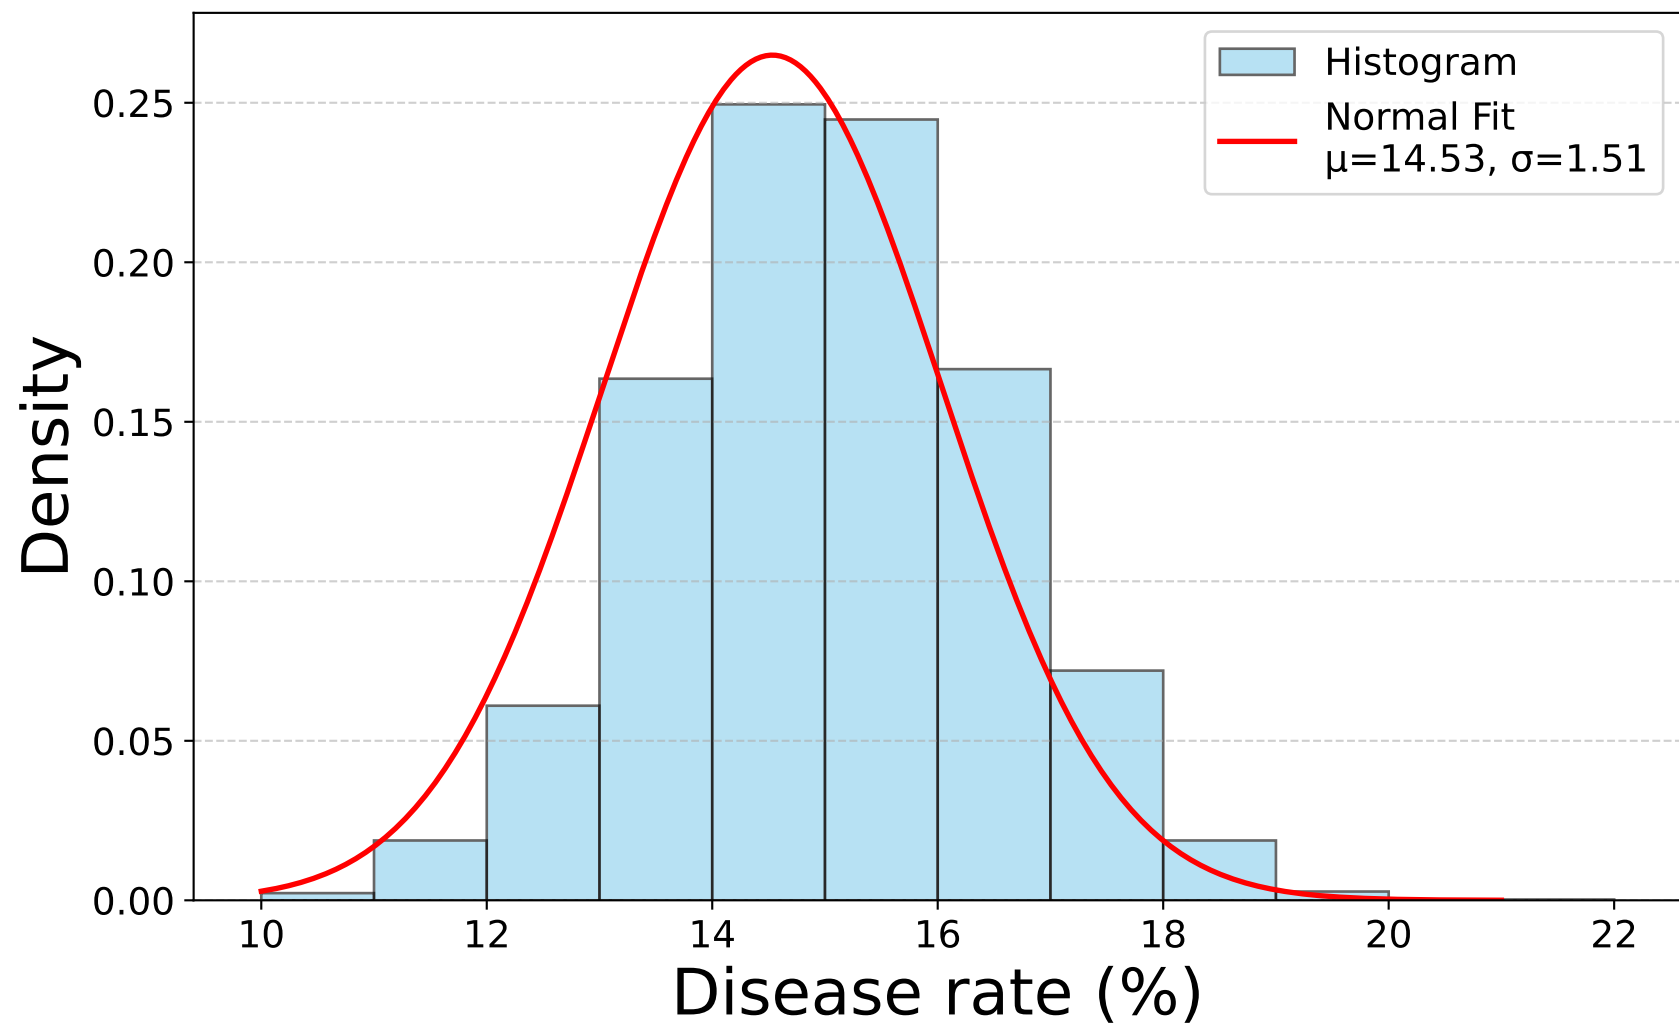

Supplement: supplementary_material [file image_distribution.pdf › FoliageGenerator/src/soybean/image_distribution.pdf]

# Disease Hotspot Distribution

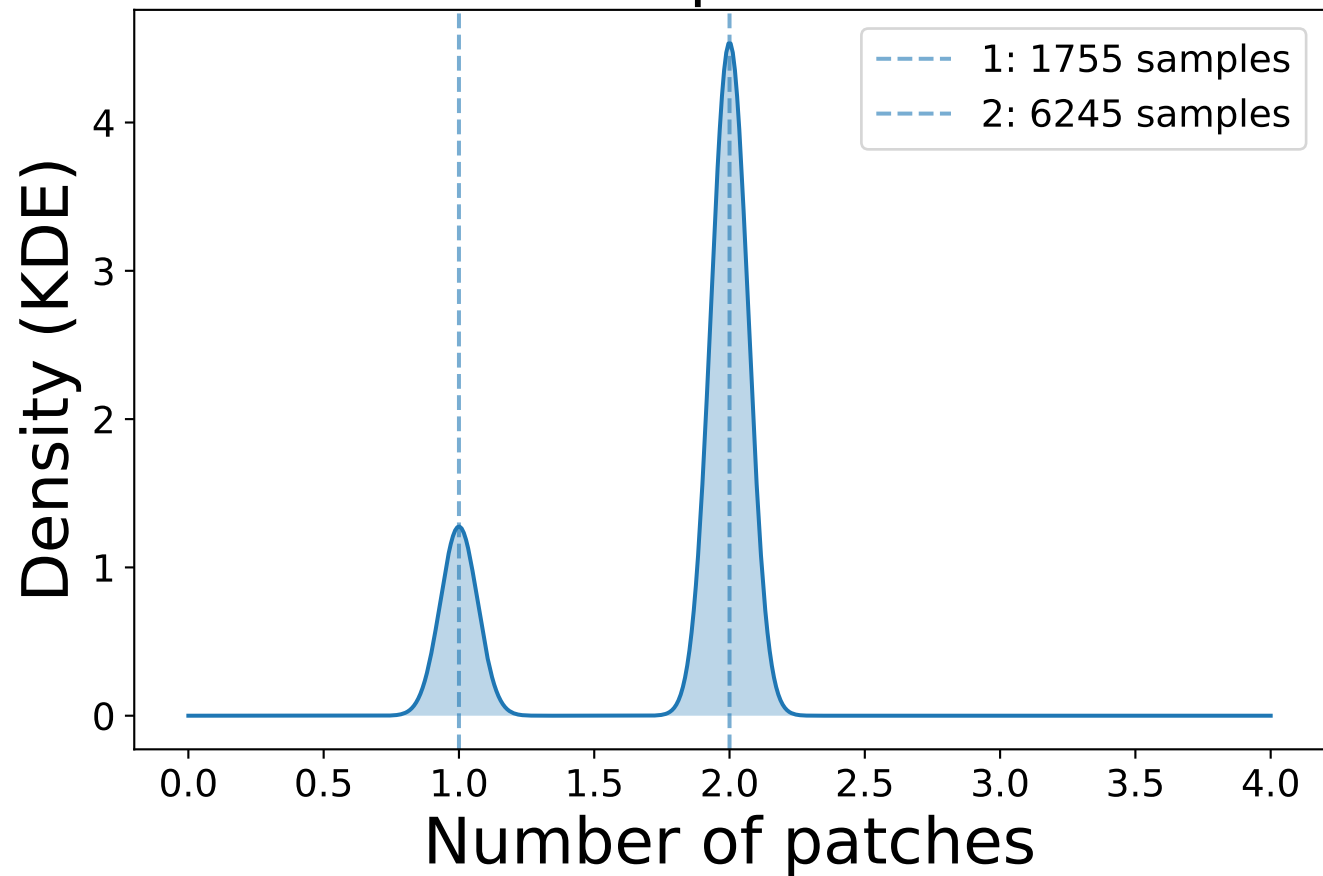

Supplement: supplementary_material [file my_plot.pdf › FoliageGenerator/src/soybean/my_plot.pdf]

# Disease Hotspot Distribution

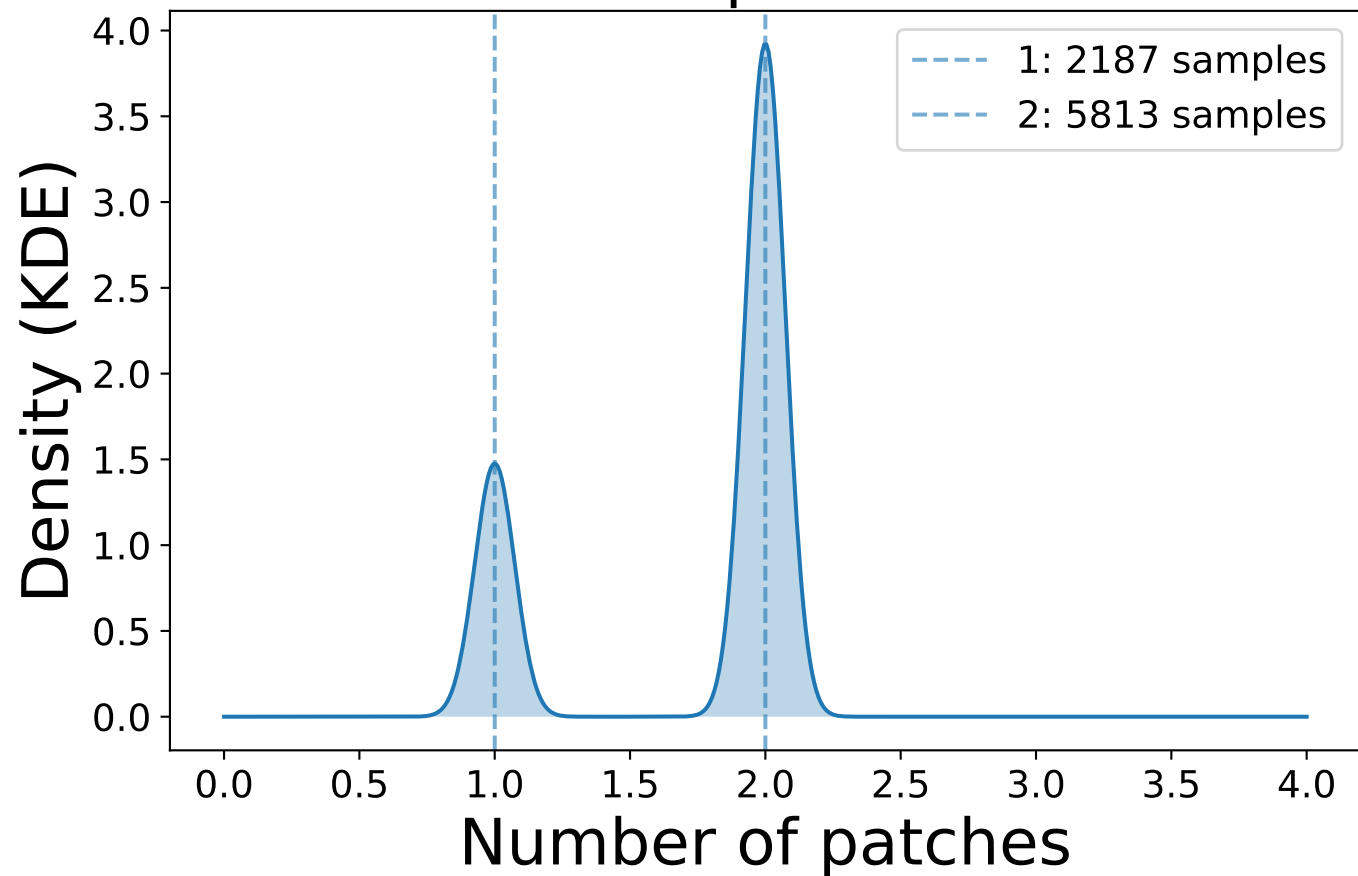

Supplement: supplementary_material [file skewed_distribution.pdf › FoliageGenerator/src/soybean/skewed_distribution.pdf]
